# Supplementary material
Source: PubMed Central journal article supplement (PMC3330427)

## **SUPPLEMENTAL MATERIAL**

### **Combined Cardiac MRI and C-Reactive Protein Levels Identify a Cohort at Low Risk for Defibrillator Firings and Death**

Wu et al: Cardiac MRI and CRP for ICD Risk Stratification

## **SUPPLEMENTAL METHODS**

### **Additional study population information**

Exclusion criteria included: other indications for ICD placement (e.g. sustained ventricular arrhythmias, cardiac arrest, syncope); contraindications to CMR (e.g. existing cardiac device); New York Heart Association (NYHA) functional class IV; acute myocarditis or acute sarcoidosis or infiltrative disorders such as amyloidosis, or hemochromatosis, congenital heart disease, or hypertrophic cardiomyopathy; or renal insufficiency (creatinine clearance, CrCl<30 ml/min after July 2006; CrCl<60 ml/min after February 2007).

### **Blood sample collection and analysis**

Blood samples were collected in EDTA at the time of ICD insertion and processed for long-term storage at -80°C. These plasma samples were thawed and assayed for hsCRP (Alpco) and NT-proBNP (Roche) using enzyme-linked immunosorbent assays. Other blood analytes (serum sodium, potassium, creatinine) were measured in the clinical laboratory.

### **Additional CMR imaging and analysis details**

Short and long-axis cine images were acquired with a steady-state free precession sequence (TR=2.5-3.8; TE=1.1-1.6; flip angle=45-60°; temporal resolution 40-45 msec; average spatial resolution 1.5x2.4x8 mm). Two-dimensional LGE cross-sectional short- and long-axis images through the LV were acquired starting at approximately 15 minutes after intravenous administration of 0.15-0.20 mmol/kg of gadodiamide (Omniscan, GE Healthcare) or gadopentetate dimeglumine (Magnevist, Schering AG) using an inversion-recovery fast gradient-echo sequence (TR=5.4-8.3; TE=1.3-3.9; TI optimized for nulling of normal myocardium; spatial resolution 1.4-1.5x2.2-2.4x8 mm).

LV EF, volumes, and mass were quantified by standard methods.<sup>1</sup>

## **SUPPLEMENTAL RESULTS**

Of the 18 nonischemic cardiomyopathy patients who sustained the primary endpoint, 14 occurred in patients with idiopathic cardiomyopathy.

### **Additional secondary endpoint occurrence**

The secondary combined endpoint of HF hospitalizations, appropriate ICD firings, and cardiac death occurred in 67 patients (29%). Incidence rates in the low, medium, and high gray-CRP groups were 2.9%, 9.3%, and 23%/year, respectively, log-rank  $p < 0.001$ .

ATP therapy alone (in the absence of ICD shocks) for ventricular arrhythmias was seen in 5 patients, all in the intermediate gray-CRP group. When ATP therapy was included as endpoint with appropriate ICD shocks and cardiac death, incidence rates by gray-CRP tertiles were 0.7%, 6.6%, and 16.0%/year, respectively, log-rank  $p < 0.001$  (Supplemental Figure 3).

There were 35 inappropriate firings (15%) with annual incidence rates of: 9.3% (low gray-CRP); 4.5% (intermediate); and 2.2% (high gray-CRP), log-rank  $p = 0.07$ . This highlights the negative impact of the ICD in the low risk group. There were 20 device complications (8.5%), predominantly lead revisions for dislodgement or fractures, but also 2 system extractions for device infections and 1 pneumothorax requiring surgical pleurodesis and prolonged hospitalization.

## **SUPPLEMENTAL REFERENCES**

1. Bellenger NG, Pennell DJ. Assessment of cardiac function. In: Manning WJ, Pennell DJ, eds. *Cardiovascular magnetic resonance*. 1st ed. Philadelphia, Pennsylvania: Churchill Livingstone; 2002:99-111.

**Supplemental Table: Characteristics of the Cohort by Etiology of Cardiomyopathy**

|                                                       | Nonischemic (n=98)                 | Ischemic (n=137)                   | p-value |
|-------------------------------------------------------|------------------------------------|------------------------------------|---------|
| Male (%)                                              | 62 (63)                            | 117 (85)                           | <0.001  |
| Age (mean $\pm$ SD) (years)                           | 52 $\pm$ 12                        | 61 $\pm$ 11                        | <0.001  |
| % $\geq$ 70 years old                                 | 3                                  | 23                                 | <0.001  |
| Caucasian/African-American/<br>Other (%)              | 54 (56) / 40 (41) /<br>3 (3)       | 111 (81) / 22 (16) /<br>4 (3)      | <0.001  |
| Time from incident MI/<br>cardiomyopathy<br>diagnosis | Median 1.05 years<br>[IQR 0.3-5.4] | Median 4.4 years<br>[IQR 0.9-10.7] | <0.001  |
| NYHA Class I/ II/ III (%)                             | 14 (14) / 45 (46) /<br>39 (40)     | 43 (31) / 51 (37) /<br>43 (31)     | 0.01    |
| <b><i>Risk factors (%)</i></b>                        |                                    |                                    |         |
| Hypertension                                          | 42 (43)                            | 93 (68)                            | <0.001  |
| Hypercholesterolemia                                  | 37 (38)                            | 104 (76)                           | <0.001  |
| Diabetes                                              | 14 (14)                            | 46 (34)                            | 0.001   |
| Nicotine use                                          | 30 (31)                            | 95 (69)                            | <0.001  |
| <b><i>Medication usage (%)</i></b>                    |                                    |                                    |         |
| ACE-inhibitor or ARB                                  | 87 (89)                            | 121 (88)                           | 0.91    |
| Beta-blocker                                          | 91 (93)                            | 129 (94)                           | 0.69    |
| Lipid-lowering                                        | 41 (42)                            | 123 (90)                           | <0.001  |
| Antiarrhythmics (amio)                                | 6 (6)                              | 11 (8)                             | 0.58    |
| Diuretics                                             | 59 (60)                            | 79 (58)                            | 0.70    |
| Digoxin                                               | 27 (28)                            | 21 (15)                            | 0.02    |
| Aldosterone inhibitor                                 | 25 (26)                            | 25 (18)                            | 0.18    |
| Aspirin                                               | 48 (49)                            | 125 (91)                           | <0.001  |
| <b><i>Electrophysiologic variables</i></b>            |                                    |                                    |         |
| History of atrial fibrillation (%)                    | 14 (14)                            | 28 (20)                            | 0.23    |
| Heart rate                                            | 74 $\pm$ 14 bpm                    | 70 $\pm$ 12 bpm                    | 0.02    |
| % with HR $\geq$ 80 bpm                               | 36                                 | 25                                 | 0.07    |
| QRS duration                                          | 123 $\pm$ 33 msec                  | 117 $\pm$ 27 msec                  | 0.11    |
| % with QRS>120 msec                                   | 45                                 | 32                                 | 0.05    |
| Presence of LBBB                                      | 32 (33)                            | 22 (16)                            | 0.003   |
| Received biventricular ICD                            | 39 (40)                            | 24 (18)                            | <0.001  |
| <b><i>Laboratory/biomarker variables</i></b>          |                                    |                                    |         |
| Sodium (mEq/L)                                        | 139 $\pm$ 3                        | 139 $\pm$ 3                        | 0.80    |
| Potassium (mEq/L)                                     | 4.2 $\pm$ 0.4                      | 4.3 $\pm$ 0.4                      | 0.39    |
| Creatinine (mg/dL)                                    | 1.04 $\pm$ 0.7                     | 1.03 $\pm$ 0.3                     | 0.85    |
| % with Cr>1.3                                         | 16 (8)                             | 3 (7)                              | 0.70    |
| hsCRP (mg/L)                                          | Median 3.2<br>[IQR 1.1-6.8]        | Median 3.4<br>[IQR 1.3-8.8]        | 0.61    |
| NT-proBNP (pg/ml)                                     | Median 2080<br>[IQR 1480-3350]     | Median 23700<br>[IQR 1470-3580]    | 0.31    |

|                                                                  |                         |                                |        |
|------------------------------------------------------------------|-------------------------|--------------------------------|--------|
| <b>Enrollment LVEF (non-CMR)</b>                                 | 21±7%                   | 25±7%                          | <0.001 |
| <b>CMR characteristics</b>                                       |                         |                                |        |
| LVEF (mean±SD)                                                   | 25±10%                  | 28±8%                          | <0.001 |
| % with LVEF≤20%                                                  | 35 (36)                 | 22 (16)                        | 0.001  |
| LV end-diastolic volume index<br>(LVEDV/BSA)(ml/m <sup>2</sup> ) | 135±50                  | 120±36                         | 0.01   |
| LV end-systolic volume index<br>(LVESV/BSA)(ml/m <sup>2</sup> )  | 104±51                  | 88±33                          | 0.01   |
| LV mass index<br>(LV mass/BSA) (ml/m <sup>2</sup> )              | 78±29                   | 76±24                          | 0.41   |
| <b>Hyperenhancement</b>                                          |                         |                                |        |
| LGE present (%)                                                  | 40 (41)                 | 131 (95)                       | <0.001 |
| Gray zone extent (grams)                                         | Median 0<br>[IQR 0-2.3] | Median 14.5<br>IQR [7.4-22.4]  | <0.001 |
| Core region (grams)                                              | Median 0<br>[IQR 0-3.1] | Median 19.2<br>IQR [14.1-27.6] | <0.001 |
| Total (gray+core) (grams)                                        | Median 0<br>IQR [0-5.4] | Median 36.1<br>IQR [21.0-47.4] | <0.001 |
| <b>Number of Primary Events (%)</b>                              |                         |                                |        |
| Total                                                            | 18 (18)                 | 27 (19)                        | 0.80   |
| <b>Type of event</b>                                             |                         |                                |        |
| Appropriate ICD firing                                           | 12 (12)                 | 18 (13)                        | 0.84   |
| Cardiac death                                                    | 6 (6)                   | 9 (7)                          | 0.97   |

## **SUPPLEMENTAL FIGURE LEGENDS**

Supplemental Figure 1: Kaplan-Meier curves for the primary endpoint in the ischemic (Panel A) and nonischemic subgroups (Panel B).

Supplemental Figure 2: Forest plot showing hazard ratios (95% CI) for the primary endpoint associated with each 10 gram increment of GZ by patient subgroups. HRs were stratified for etiology of cardiomyopathy, except when etiology was specifically assessed. The area of each data marker is proportional to the inverse of the HR variance (i.e. larger-sized markers connote smaller variances). The non-significant p-values across all categories indicate that: (1) the association between GZ and the primary outcome persisted across all subgroups; and (2) there is no interaction between GZ and any other variable, including hsCRP.

Supplemental Figure 3: Kaplan-Meier curves for the secondary endpoint of appropriate ATP therapy, appropriate ICD shocks, and cardiac death.

Supplemental Figure 1

Panel A: Ischemic cohort

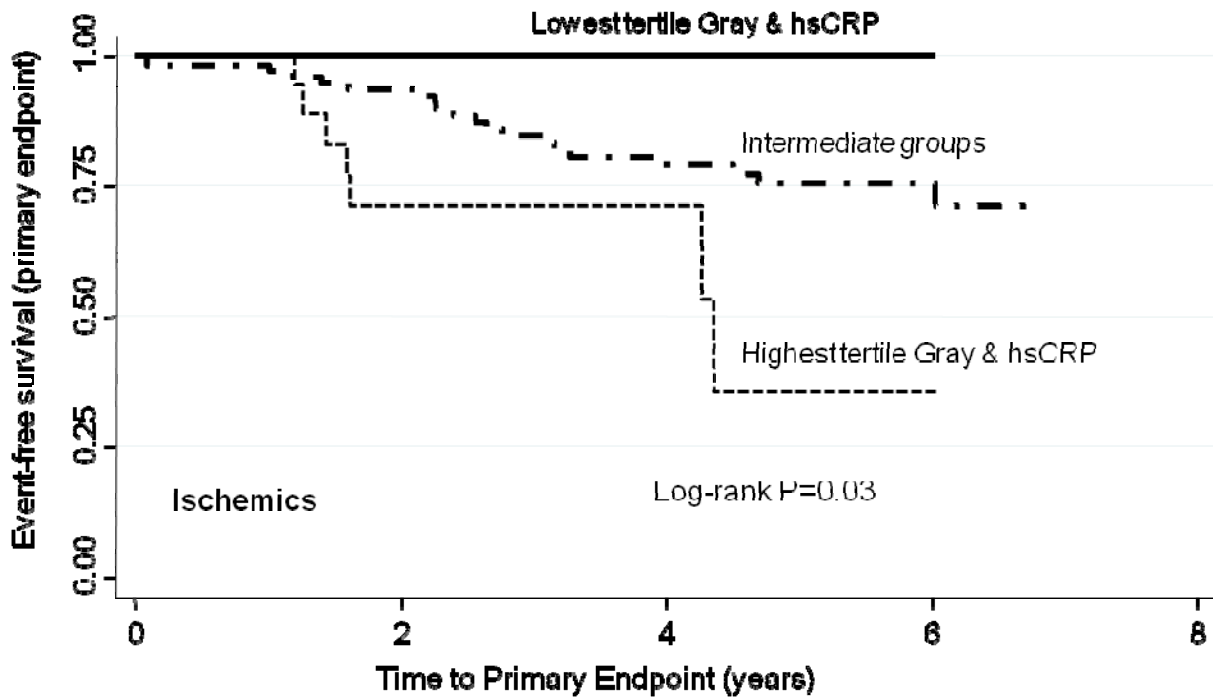

Panel B: Nonischemic cohort

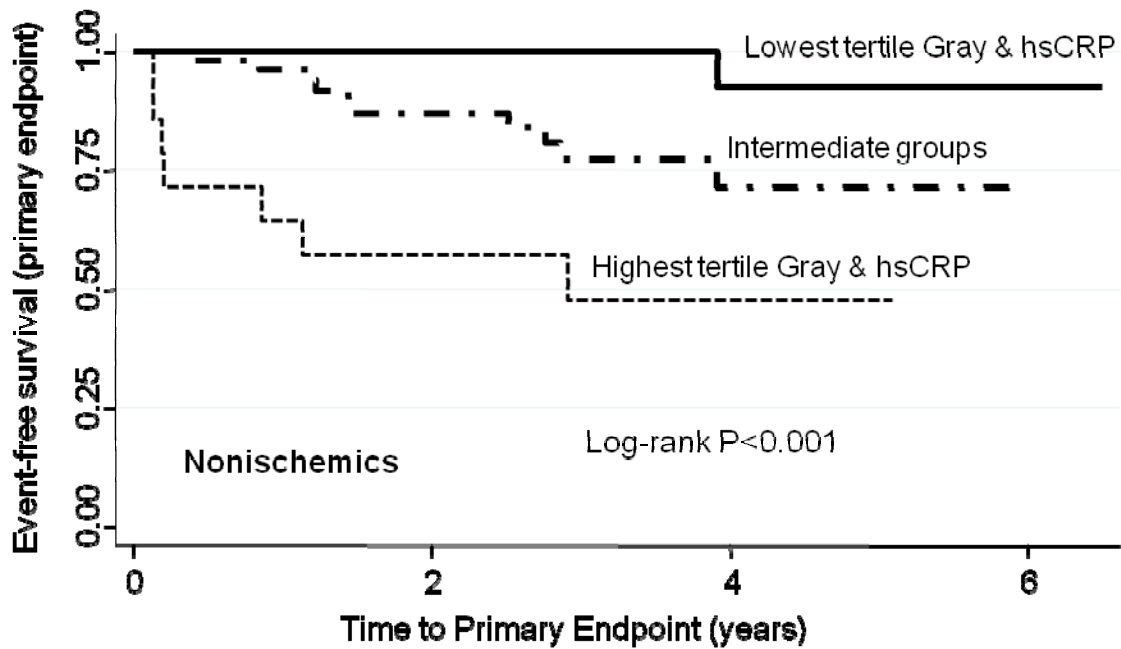



Supplemental Figure 2

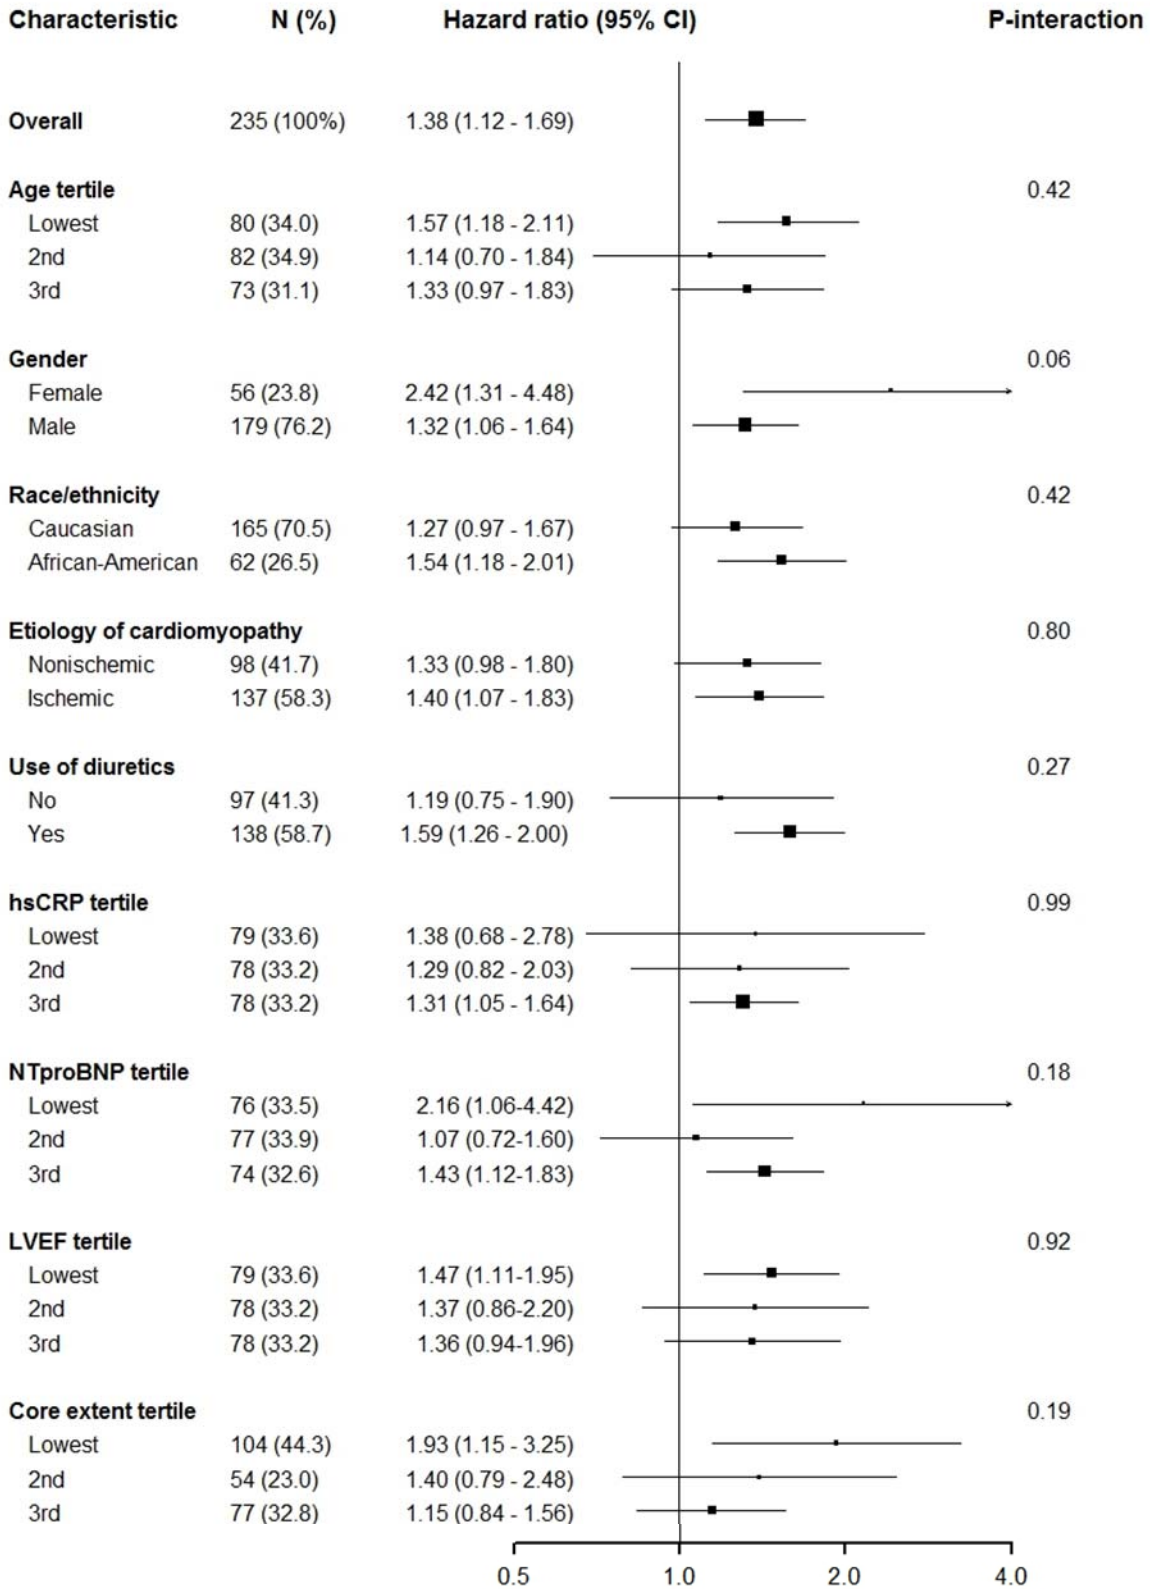

Supplemental Figure 3

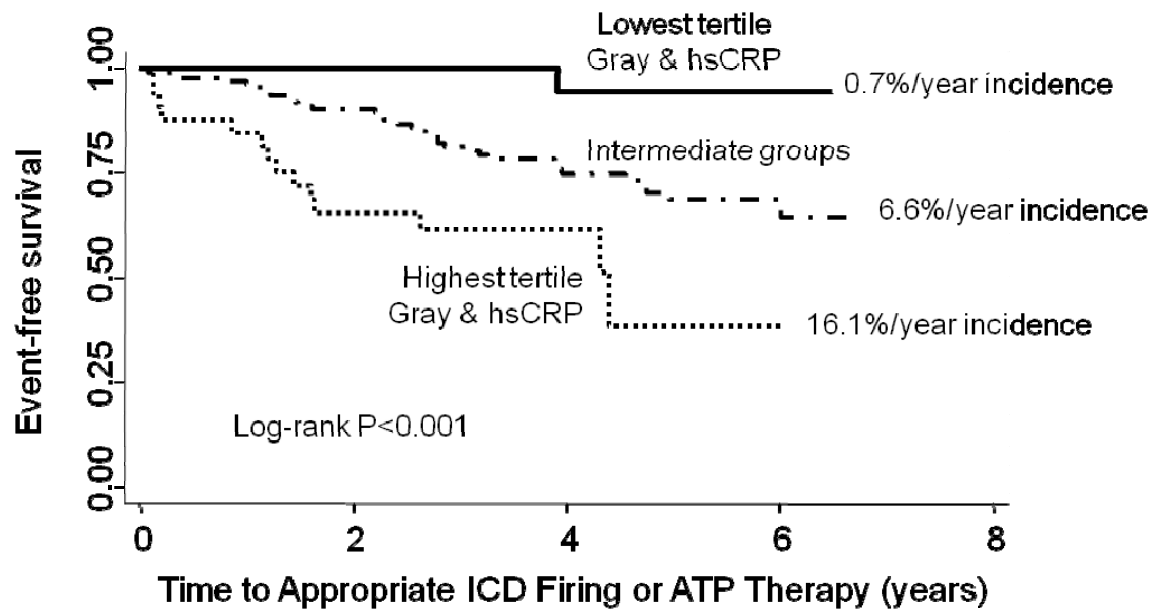

Supplement: NIHMS358793-supplement-1.pdf [file NIHMS358793-supplement-1.pdf]
